# Supplementary material
Source: PubMed Central journal article supplement (PMC3538191)
Supplement: 1216454109_pnas.201216454SI.pdf [file 1216454109_pnas.201216454SI.pdf]

# Supporting Information

Lee et al. 10.1073/pnas.1216454109

## SI Methods

**siRNA Screen.** SMART pools (Dharmacon), comprising four duplexes targeting a single human mRNA transcript, were individually arrayed into wells of black, clear-bottom 384-well plates (Costar 3712; Corning) containing a 1:100 dilution of Lipofectamine 2000 (Invitrogen) in OptiMEM (Invitrogen). Duplexes and lipids were incubated for 20 min at room temperature and mixed with HeLa cells to yield final concentrations of  $5 \times 10^4$  cells/mL and 50 nM siRNA. Plates were inoculated with 1,250 HeLa cells per well, and cells were centrifuged for 5 min at  $700 \times g$ . At 48 h after transfection, the ~5,000 cells were inoculated with 25,000 infectious particles of rVSV-eGFP. Cells were fixed 7 h later with 2% formaldehyde in PBS, the nuclei were counterstained with 4  $\mu$ g/mL Hoechst nuclear dye (33342; Invitrogen) for 10 min at room temperature, and unincorporated dye was removed by washing once with 60  $\mu$ L PBS per well. Individual wells were examined using a cellWoRX High Content Cell Analysis System (Applied Precision), and the cell-scoring module of MetaXpress Software (Molecular Devices) was used to quantify the total number of cells and percentage of EGFP-positive cells. All samples were performed in duplicate.

**Cells and Viruses.** HeLa cells were maintained in DMEM (Invitrogen) supplemented with 10% FBS (Tissue Culture Biologicals). Vesicular stomatitis virus (VSV), rVSV-EGFP, rVSV-M51R, and rVSV-Luc were amplified in BHK-21 cells (ATCC), purified through a 10% sucrose (wt/vol) cushion prepared in NTE (10 mM Tris-pH 7.4, 100 mM NaCl, 1 mM EDTA), and virus stocks were stored in NTE at  $-80^\circ\text{C}$  (1). The 5' and 3' UTR sequences of the VSV luciferase mRNA were AACAGTAATCAGAATTCTC-GAGAAAGCCACC (genomic coordinates: 51–81) and TGGC-CATATGAAAAAAA (genomic coordinates: 1735–1751), respectively. Other viruses were kind gifts: poliovirus (J. Hogle, Harvard Medical School, Boston, MA), measles virus-GFP (P. Duprex, Boston University, Boston, MA), NDV-GFP (A. Garcia-Sastre, Mount Sinai School of Medicine, New York, NY), and RBV-mCherry (E. Calloway, Salk Institute, La Jolla, CA).

**Microscopy.** Cells were fixed with 2% paraformaldehyde for 15 min, washed with PBS (137 mM NaCl, 2.7 mM KCl, 100 mM  $\text{Na}_2\text{HPO}_4$ , 2 mM  $\text{KH}_2\text{PO}_4$ ), and where indicated, stained with fluorescent DNA binding stain, DAPI. Coverslips were mounted using ProLong Antifade (Invitrogen). For high-magnification images (63 $\times$ , 20 $\times$ ), cells were imaged on a Zeiss Axioplan 2 inverted fluorescence microscope (Carl Zeiss MicroImaging) with a Hamamatsu Orca-HR (C4742-94) camera (Hamamatsu) and analyzed using Axiovision software. For low-magnification images (10 $\times$ ), cells were imaged on the cellWoRx high-content screening microscope.

**Plasmids, siRNAs, and Transfection.** The pFR-CrPV (Cricket paralysis virus) bicistronic luciferase reporter plasmid was obtained from P. Sharp through Addgene (plasmid 11509). The plasmid pRL-CMV (Promega) was used to generate renilla luciferase mRNA in HeLa cells for in vitro translation. To generate the rpL40-expressing plasmid (pcDNA3.1-rpL40), rpL40 was amplified from a SP73 vector containing rpL40 (a kind gift from K. Hertel, University of California, Irvine, CA) and inserted into the Acc65I and XhoI sites of pcDNA3.1 (Invitrogen). siRNA-resistant pcDNA3.1-rpL40 was generated by site-directed mutagenesis using the QuikChange methodology (Stratagene) and primers rpL40-SM-F (5'-GGTGTTCGCGCTGCGAGGTGGG-ATCATCGAGCCTTCTCTCCGCCAGC-3') and rpL40-SM-R

(5'-GCTGGCGGAGAGAAGGCTCGATGATCCCACCTCGC-AGGCGCAACACC-3'). Identical cloning strategies were used for constructing expression vectors for CLG1 (YGL215W) and DDR2 (YOL052C-A). Briefly, the 5' UTR was cloned into pGEM3 using the EcoRI and BamHI sites; luciferase and the 3' UTR were double ligated into the vector using the BamHI, NotI, and SalI sites; and two copies of a T7 terminator were added using the SalI and HindIII sites.

The 5' and 3' UTR sequences of the DDR2 reporter mRNA were AAGCAAGCACGCTAATTTAATATCGATTAAAC and GAAAACGCCGCTTACTGCCACGATGATGATACCCTATTG-ACGTTTCTGAAATGTATAATTTCTTTTCTCATCTTCCCC-TTTGATATTCCATCTATAGGCCCCAGAGTAGTAAATTT-GGTGCTTTAATTTTTTTTCTTCTTCCAGTTCGTCTCT-ATTTTTTCATTCCATTATATTTATTTATCAGTTTTACTT-TCTCAAATATTCTTATATAACACTATTTTCATCTACGTA-ACCGAAAATAAG, respectively (2). The 5' and 3' UTR sequences of the CLG1 reporter mRNA were ACAAATCATTG-ATCTTTTAAGAAAAACGCACAAGGATCATATACTAGAT-TCTCGTTCTCGTTTTTTTCTTCTTTTTTTTTTCTCTAAA-GCCTTTTACTGGGTTAATTTCTTTTATTGACCCAAATTA-AAAGAAAACGTTTCTCAGGAGACTTTTTAAGCAAAT-TTAGCAAATTTGTGTTTGCTGTTGTTTTTACAGAGACT-GCATTACTTGAAGGTTTTGCCTTTAAGTCTTCGAGTCGT-TTTTTTTTATTAACTTAATCCTTTTTCTGTGTGTTGTG-TATATTTCAGTGGGGTTATTTTACAGTATTCGAAGAGAC-TTCGTTTCACACATTTAAACCAGCTTATTAGCGTTTAG-CTTATACACTACAAGGAATTTTTTTTTTCTTTAACATTA-TTAAGACAGTTATTGAGTTAATTCGTCTTTCAGCCCCC-TCCCCCAACAACACCCCTTTCATATAGAA and TGAA-AACTTTTTTTTTCTTATTTTTTCTTTTGATCCCATCGAATT-ACTTTCTCTTTTGCCCGAGGATCATCTTTCTAATCTATCA-TTTTATTATTTTCTCTCATGAGAAAACAGAATTTTCGAA-ACAGATATAATAAAAAAATTGAAAAATTTGAAAAAAA-AAAATCTAGAAACATATTTTCTTAAATGAAAAATCGGA-AGCTAACAAAATTTTTGAAAAACGAAATAAAGAAGAA-AGATTATTATTACTTTTTTTTATTAGTACTCCATATG-GACCTCTTAGGTGAGTGATCTTATT, respectively (2).

Plasmid transfections were performed using Lipofectamine 2000 according to the manufacturer's instructions. For rescue of the siRNA-induced phenotype, HeLa cells were transfected with the indicated plasmid 24 h before transfection of cells with siRNA. Transfection of plasmids into vTF7-3-infected bsrT7 cells was performed as described, except using 12  $\mu$ g of plasmid per 10-cm dish, with cells at 80% confluency (1). RNA was harvested and purified from cells at 24 h after transfection.

Individual siRNAs used were siGENOME nontargeting siRNA 3 (D-001210-03), rpL40-1 (D-011794-02), rpL40-2 (D-011794-04), and rpL22 (D-011143-02) (Dharmacon). For siRNA transfection into a 24-well plate, 1  $\mu$ L of Lipofectamine 2000 was mixed with 100  $\mu$ L of OptiMEM and incubated at room temperature for 5 min. One hundred microliters of OptiMEM and 1.5  $\mu$ L of 20  $\mu$ M siRNA were added, mixed, and incubated at room temperature for 15 min. Trypsinized HeLa cells ( $3 \times 10^4$ ) in 400  $\mu$ L of DMEM with 10% FBS was added to the lipid-siRNA mix and plated, and experiments were performed 48 h later. This protocol was scaled accordingly to different cell culture surface areas.

**Ribonucleoprotein Transfection.** To isolate ribonucleoproteins (RNPs), purified VSV was mixed with 12.5 mM Tris, pH 7.4, 5% glycerol, 5 mM EDTA, pH 8, 3.5 mM DTT, 0.1% Triton X-100, and 500 mM CsCl in a total volume of 600  $\mu$ L and incubated on







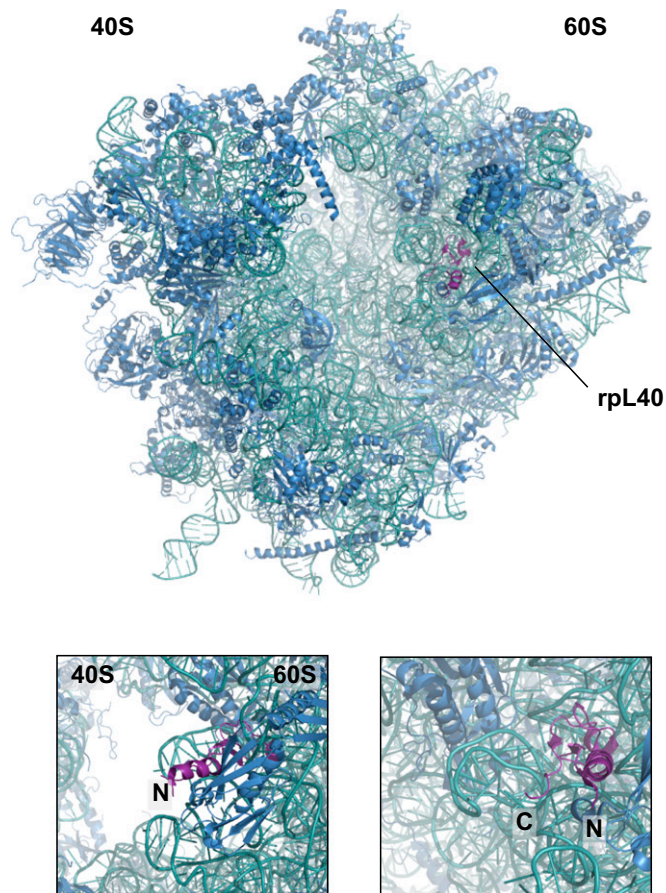

**Fig. S4.** Localization of rpL40 on the 80S ribosome. Localization of rpL40 on the crystal structure of the 80S ribosome. Ribosomal proteins are blue, and ribosomal RNAs are teal. Rpl40 is magenta (PDB 2XZM, 4A17, 3A19) (1). N and C termini are indicated in the two rotated views of rpL40.

1. Klinge S, Voigts-Hoffmann F, Leibundgut M, Arpagaus S, Ban N (2011) Crystal structure of the eukaryotic 60S ribosomal subunit in complex with initiation factor 6. *Science* 334(6058): 941–948.

|                                              |                                                                                                                       |
|----------------------------------------------|-----------------------------------------------------------------------------------------------------------------------|
| <b>Archaea (<i>S. solfataricus</i>)</b>      | M P L T D P A K L Q I V Q Q R V F L K K V C R K C G A L N P I R A T K C R R - - C - H S T N L R L K K K E L P T K K C |
| <b>Flatworm (<i>S. japonicum</i>)</b>        | -- I I E P T L K A L A Q K Y N C E K M I C R K C Y A R L H P K A T N C R K R K C G H T S N V R P K K K L R - - - - -  |
| <b>Yeast (<i>S. cerevisiae</i>)</b>          | -- I I E P S L K A L A S K Y N C D K S V C R K C Y A R L P P R A T N C R K R K C G H T N Q L R P K K K L K - - - - -  |
| <b>Green algae (<i>C. reinhardtii</i>)</b>   | -- I I E P S L Q A L A R K Y N Q E K M I C R K C Y A R L H P R A K N C R K K S C G H T N Q L R P K K K L K - - - - -  |
| <b>Segmented worm (<i>E. complanata</i>)</b> | -- I I E P S L R M L A Q K Y N C D K M I C R K C Y A R L H P R A T N C R K K K C G R T S N I R P K K K I K - - - - -  |
| <b>Human (<i>H. sapien</i>)</b>              | -- I I E P S L R Q L A Q K Y N C D K M I C R K C Y A R L H P R A V N C R K K K C G H T N N L R P K K K V K - - - - -  |
| <b>Monkey (<i>M. fascicularis</i>)</b>       | -- I I E P S L R Q L A Q K Y N C D K M I C R K C Y A R L H P R A V N C R K K K C G H T N N L R P K K K V K - - - - -  |
| <b>Cow (<i>B. taurus</i>)</b>                | -- I I E P S L R Q L A Q K Y N C D K M I C R K C Y A R L H P R A V N C R K K K C G H T N N L R P K K K V K - - - - -  |
| <b>Pig (<i>S. scrofa</i>)</b>                | -- I I E P S L R Q L A Q K Y N C D K M I C R K C Y A R L H P R A V N C R K K K C G H T N N L R P K K K V K - - - - -  |
| <b>Mouse (<i>M. musculus</i>)</b>            | -- I I E P S L R Q L A Q K Y N C D K M I C R K C Y A R L H P R A V N C R K K K C G H T N N L R P K K K V K - - - - -  |
| <b>Cat (<i>F. catus</i>)</b>                 | -- I I E P S L R Q L A Q K Y N C D K M I C R K C Y A R L H P R A V N C R K K K C G H T N N L R P K K K V K - - - - -  |
| <b>Giant panda (<i>A. melanoleuca</i>)</b>   | -- I I E P S L R Q L A Q K Y N C D K M I C R K C Y A R L H P R A V N C R K K K C G H T N N L R P K K K V K - - - - -  |
| <b>Fly (<i>D. melanogaster</i>)</b>          | -- I I E P S L R I L A Q K Y N C D K M I C R K C Y A R L H P R A T N C R K K K C G H T N N L R P K K K L K - - - - -  |

**Fig. S5.** Alignment of rpL40 sequences. Rpl40 sequences, with the C-terminal ubiquitin extension removed, were aligned using MUSCLE and visualized using Jalview. Colored sequences indicate more than 70% conserved identity. GenBank IDs are *Homo sapien* (AAI01833.1), *Saccharomyces cerevisiae* (CAA86130.1), *Macaca fascicularis* (P0C273.2), *Bos taurus* (DAA28295.1), *Sus scrofa* (NP\_999376.1), *Mus musculus* (NP\_063936.1), *Felis "koz" catus* (NP\_001116826), *Ailuropoda melanoleuca* (AEA39530.1), *Drosophila melanogaster* (NP\_476776.1), *Eurythoe complanata* (ABW23236), *Schistosoma japonicum* (226477078), *Chlamydomonas reinhardtii* (EDO98280.1), and *Sulfolobus solfataricus* (Q980V5.1).

**Table S1. SiRNA screen of ribosomal proteins required for VSV replication. Ribosomal proteins are grouped by phenotype of knockdown as indicated**

[Table S1](#)

**Table S2. List of cellular transcripts whose polysome association was reduced by more than threefold upon depletion of rpL40**

[Table S2](#)
